# Supplementary material
Source: publisher figshare collection journal article supplement (https://rs.figshare.com/ndownloader/files/13310123)
Supplement: Supplementary file 1 [file 13310123]

## Sheet: Sheet1
Supplemental table 1. Sodium concentation in leaf species across the globe presented by geographic location. Fold change was calculated based on mean Na leaf concentrations from plants in salty (>100km from coast or salted road or experimental salt addition treatments) divided by non-salty (<100 km or controls) plant Na leaf concentrations (reversed for negative values). Values of 1 indicate no c…
Family	Genus	Species	Salt-rich	Salt-scarce	Unit	Fold change	Source
Adoxaceae	Sambucus	racemosa	5.34711	3.34604	mg/L	1.59804	Wantanabe et al. 2007
Araliaceae	Acanthopanax	sciadophylloides	5.20773	3.71636	mg/L	1.4013	Wantanabe et al. 2007
Araliaceae	Aralia	cordata	4.52937	4.66344	mg/L	-1.0296	Wantanabe et al. 2007
Araliaceae	Aralia	elata	4.53127	3.46488	mg/L	1.30777	Wantanabe et al. 2007
Araliaceae	Evodiopanax	innovans	4.65539	4.98498	mg/L	-1.0708	Wantanabe et al. 2007
Araliaceae	Kalopanax	pictus	6.26701	3.42357	mg/L	1.83055	Wantanabe et al. 2007
Asclepiadaceae	Milkweed	sp.	62	2065	ppm	33.3065	Snell-Rood etal. 2014
Betulaceae	Corylus	sieboldiana	5.85793	5.91809	mg/L	-1.01027	Wantanabe et al. 2007
Blechnaceae	Struthiopteris	niponica	5.07532	4.18205	mg/L	1.2136	Wantanabe et al. 2007
Brassicaceae	Brassica	campestris	n/a	n/a	mmole/g dry weight	60	He & Cramer 1992
Brassicaceae	Brassica	carinata	n/a	n/a	mmole/g dry weight	40	He & Cramer 1992
Brassicaceae	Brassica	juncea	n/a	n/a	mmole/g dry weight	42	He & Cramer 1992
Brassicaceae	Brassica	mustard'	112	115	ppm	1.02679	Snell-Rood etal. 2014
Brassicaceae	Brassica	napus	n/a	n/a	mmole/g dry weight	29	He & Cramer 1992
Brassicaceae	Brassica	nigra	n/a	n/a	mmole/g dry weight	43	He & Cramer 1992
Brassicaceae	Brassica	oleracea	n/a	n/a	mmole/g dry weight	24.6592	He & Cramer 1992; Snell-Rood et al. 2014
Cephalotaxaceae	Cephalotaxus	harringtonia	5.26256	4.19117	mg/L	1.25563	Wantanabe et al. 2007
Clethraceae	Clethra	barbinervis	5.16213	3.97379	mg/L	1.29904	Wantanabe et al. 2007
Cupressaceae	Chamaecyparis	obtusa	3.99815	3.70437	mg/L	1.07931	Wantanabe et al. 2007
Cyperaceae	carex	sp.	414.064	557.517	ppm	1.34645	Clay et al. Unpublished data
Diapensiaceae	Shortia	soldanelloides	5.08629	4.12661	mg/L	1.23256	Wantanabe et al. 2007
Ericaceae	Lyonia	ovalifolia	5.55484	4.31615	mg/L	1.28699	Wantanabe et al. 2007
Ericaceae	Pieris	japonica	3.91941	2.69463	mg/L	1.45453	Wantanabe et al. 2007
Ericaceae	Rhododendron	obtusum	5.59781	5.08354	mg/L	1.10116	Wantanabe et al. 2007
Fabaceae	Albizia	julibrissin	3.17805	4.88734	mg/L	-1.53784	Wantanabe et al. 2007
Fabaceae	Lindera	glauca	3.79637	3.08649	mg/L	1.23	Wantanabe et al. 2007
Fagaceae	Castanea	crenata	5.65778	4.56735	mg/L	1.23874	Wantanabe et al. 2007
Fagaceae	Fagus	crenata	5.54908	4.64919	mg/L	1.19356	Wantanabe et al. 2007
Fagaceae	Quercus	acutissima	6.05678	2.60269	mg/L	2.32712	Wantanabe et al. 2007
Fagaceae	Quercus	aliena	3.49018	4.69135	mg/L	-1.34416	Wantanabe et al. 2007
Fagaceae	Quercus	mongolica	5.16004	3.50037	mg/L	1.47414	Wantanabe et al. 2007
Fagaceae	Quercus	myrsinifolia	3.81621	2.37955	mg/L	1.60375	Wantanabe et al. 2007
Fagaceae	quercus	nigra	217.405	1173.29	ppm	5.39682	Clay et al. Unpublished data
Fagaceae	Quercus		35.8	50.9	ppm	1.42179	Snell-Rood etal. 2014
Garryaceae	Aucuba	japonica	2.97041	3.14415	mg/L	-1.05849	Wantanabe et al. 2007
Hydrangeaceae	Hydrangea	hirta	6.71901	5.66988	mg/L	1.18504	Wantanabe et al. 2007
Hydrangeaceae	Hydrangea	macrophylla	5.52149	4.06217	mg/L	1.35925	Wantanabe et al. 2007
Hydrangeaceae	Hydrangea	paniculata	6.90663	3.33685	mg/L	2.0698	Wantanabe et al. 2007
Juglandaceae	Juglans	mandshurica	4.76979	4.00469	mg/L	1.19105	Wantanabe et al. 2007
Lamiaceae	Callicarpa	japonica	6.71139	6.06216	mg/L	1.1071	Wantanabe et al. 2007
Lauraceae	Lindera	obtusiloba	5.49455	3.96272	mg/L	1.38656	Wantanabe et al. 2007
Lauraceae	Lindera	umbellata	6.13394	6.21807	mg/L	-1.01372	Wantanabe et al. 2007
Magnoliaceae	Magnolia	obovata	4.37307	5.20894	mg/L	-1.19114	Wantanabe et al. 2007
Malvaceae	Tilia	japonica	4.4987	3.94546	mg/L	1.14022	Wantanabe et al. 2007
Moraceae	Ficus	citrifolia	86.8	355.5	ppm	4.09562	Bravo & Harms 2017
Moraceae	Ficus	insipida	169.6	259.9	ppm	1.53243	Bravo & Harms 2017
Moraceae	Ficus	maxima	290.82	629.295	ppm	2.16386	Bravo & Harms 2017
Moraceae	Ficus	paraensis	125.223	563.197	ppm	4.49754	Bravo & Harms 2017
Pinaceae	Picea	jezoensis	5.70931	2.79439	mg/L	2.04313	Wantanabe et al. 2007
Poaceae	Sasa	kurilensis	4.59915	3.00072	mg/L	1.53268	Wantanabe et al. 2007
Poaceae	Sasa	nipponica	3.00072	2.70136	mg/L	1.11082	Wantanabe et al. 2007
Poaceae	Sasa	senanensis	4.31214	2.97041	mg/L	1.4517	Wantanabe et al. 2007
Rosaceae	Pourthiaea	villosa	6.19644	4.11645	mg/L	1.50529	Wantanabe et al. 2007
Rosaceae	Prunus	grayana	4.35198	3.64021	mg/L	1.19553	Wantanabe et al. 2007
Rosaceae	Prunus	Xyedoensis	4.78292	4.17674	mg/L	1.14513	Wantanabe et al. 2007
Rutaceae	Phellodendron	amurense	5.14749	4.28242	mg/L	1.20201	Wantanabe et al. 2007
Rutaceae	Zanthoxylum	piperitum	5.49501	5.0093	mg/L	1.09696	Wantanabe et al. 2007
Sabiaceae	Meliosma	myriantha	5.70518	5.53457	mg/L	1.03083	Wantanabe et al. 2007
Salicaceae	Populus	sieboldii	3.29584	4.7643	mg/L	-1.44555	Wantanabe et al. 2007
Sapindaceae	Acer	japonicum	5.04032	2.91777	mg/L	1.72746	Wantanabe et al. 2007
Sapindaceae	Acer	mono	5.88332	3.36384	mg/L	1.74899	Wantanabe et al. 2007
Sapindaceae	Acer	rufinerve	5.3057	4.37827	mg/L	1.21183	Wantanabe et al. 2007
Smilacaceae	smilex	sp	372.63	517.705	ppm	1.38933	Clay et al. Unpublished data
Styracaceae	Styrax	japonica	4.48961	2.97041	mg/L	1.51144	Wantanabe et al. 2007
Styracaceae	Styrax	obassia	4.57052	3.28466	mg/L	1.39147	Wantanabe et al. 2007
Ulmaceae	Zelkova	serrata	4.95155	2.97553	mg/L	1.66409	Wantanabe et al. 2007
Woodsiaceae	Athyrium	yokoscense	3.94153	4.04217	mg/L	-1.02553	Wantanabe et al. 2007
Wantanabe T., Broadley M.R., Jansen S., White P.J., Takada J., Satake K., Takamatsu T., Tuah S.J., & Osaki M. (2007) Evolutionary control of leaf element composition in plants. New Phytologist, 174, 516-523
Snell-Rood E.C., Espeset A., Boser C.J., White W.A., & Smykalski R. (2014) Anthropogenic changes in sodium affect neural and muscle development in butterflies, PNAS, 111, 10221-10226.
Bravo A. & Harms K.E. (2017) The biogeography of sodium in Neotropical figs (Moraceae). Biotropica, 49, 18-22.
He T. & Cramer G.R. (1992) Growth and mineral nutrition of six rapid-cycling Brassica species in response to seawater salinity. Plant and Soil, 139, 285-294.
Clay N.A., Gruntz C., Evans-White M.A., Entrekin S.A. Unpublished data: Data collected after 6 months of experimental NaCl addition (0.5 g per plot in 750 ml water) or Reverse Osmosis water (750 ml) every 2 weeks
Figure 5. Mean fold change of Na+ leaf concentration for plant species (closed hexagons) and plant families (open-crossed hexagons). Fold change was calculated based on mean Na leaf concentrations from plants in salty (>100km from coast or salted road or experimental salt additions) divided by non-salty (<100 km or controls) plant Na leaf concentrations (reversed for negative values). Values of 1…
